# Supplementary material for: Digital measurement of ocular microtremor in Parkinson’s Disease: Analytical and clinical validation
Source: Research Square preprint supplement (doi:10.21203/rs.3.rs-7133522/v1), 2025-07-25

## SUPPLEMENTARY MATERIAL 1

### Digital measurement of ocular microtremor in Parkinson's Disease: Analytical and clinical validation

---

Lisa Graham<sup>1,2</sup>, Rodrigo Vitorio<sup>1</sup>, Patrick Tait<sup>1</sup>, Richard Walker, Alan Godfrey<sup>4</sup>, Rosie Morris<sup>1,3</sup> and Samuel Stuart<sup>1,3,5</sup>

<sup>1</sup>*Department of Sport, Exercise and Rehabilitation, Northumbria University, Newcastle, UK*

<sup>2</sup>*Gateshead Health NHS foundation trust, Gateshead, UK*

<sup>3</sup>*Northumbria Healthcare NHS foundation trust, North Shields, UK*

<sup>4</sup>*Department of Computer and Information Sciences, Northumbria University, UK*

<sup>5</sup>*Oregon Health & Science University, Portland, Oregon, USA*

#### Corresponding author:

Dr Samuel Stuart

Visiting Associate Professor, Department of Sport, Exercise and Rehabilitation, Northumbria University, Newcastle upon Tyne, UK

Clinical Assistant Professor, Department of Neurology, Oregon Health & Science University, Portland, Oregon, USA

Email address: [samuel2.stuart@northumbria.ac.uk](mailto:samuel2.stuart@northumbria.ac.uk)

Telephone number: +44 (0) 7955067101

Abstract: 242 words

Main article: 4201

**Number of figures and tables:** 4 figures, 3 tables (see end of document)

Bland-Altman Plot – OMT (Hz) in the Right Eye:

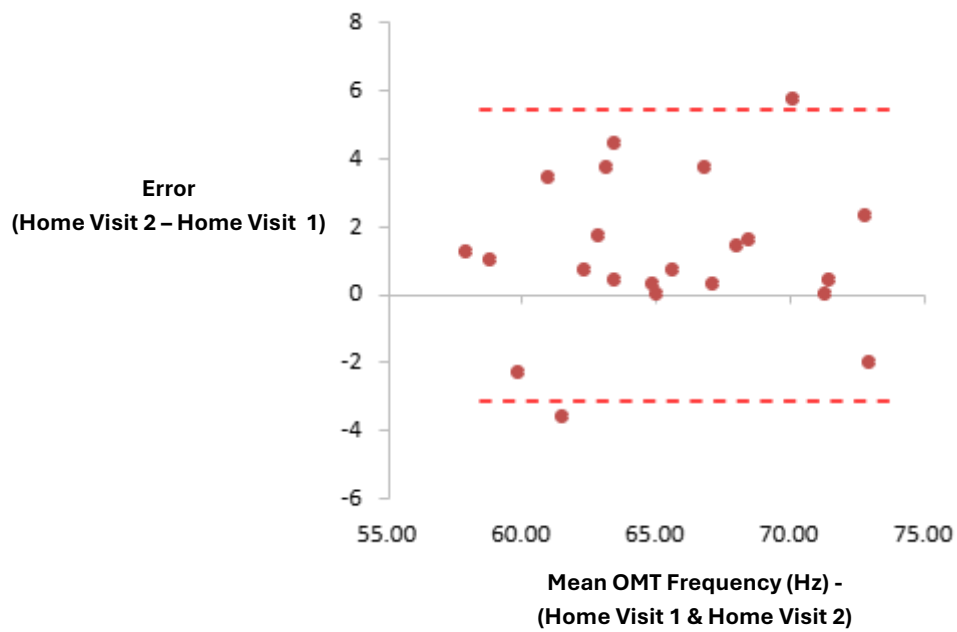

Bland-Altman Plot – OMT (Hz) in the Left Eye:

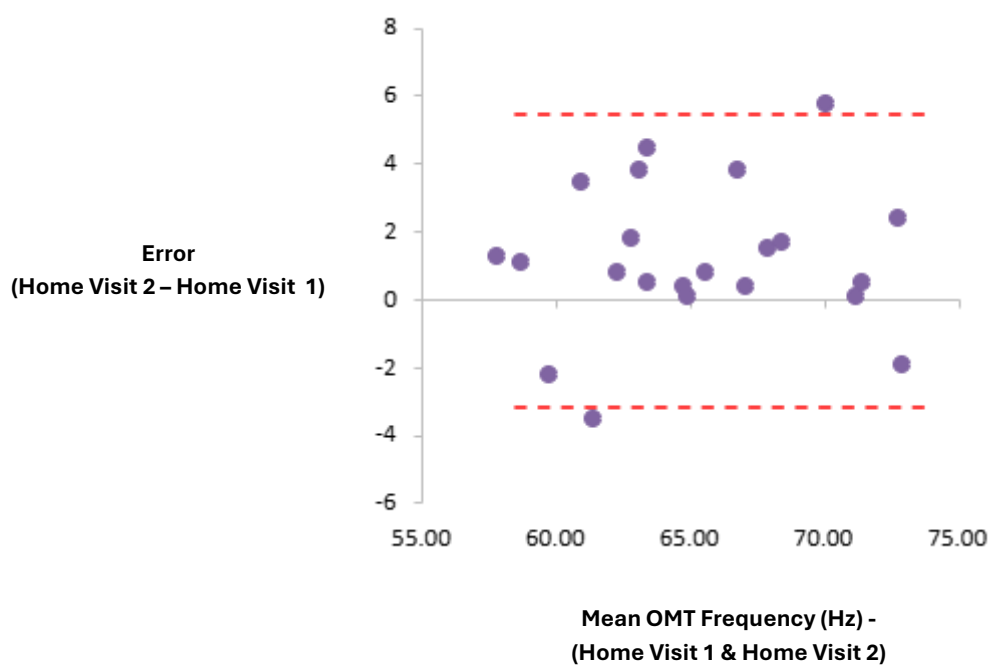

Bland-Altman Plot – OMT (Hz) in Both Eyes:

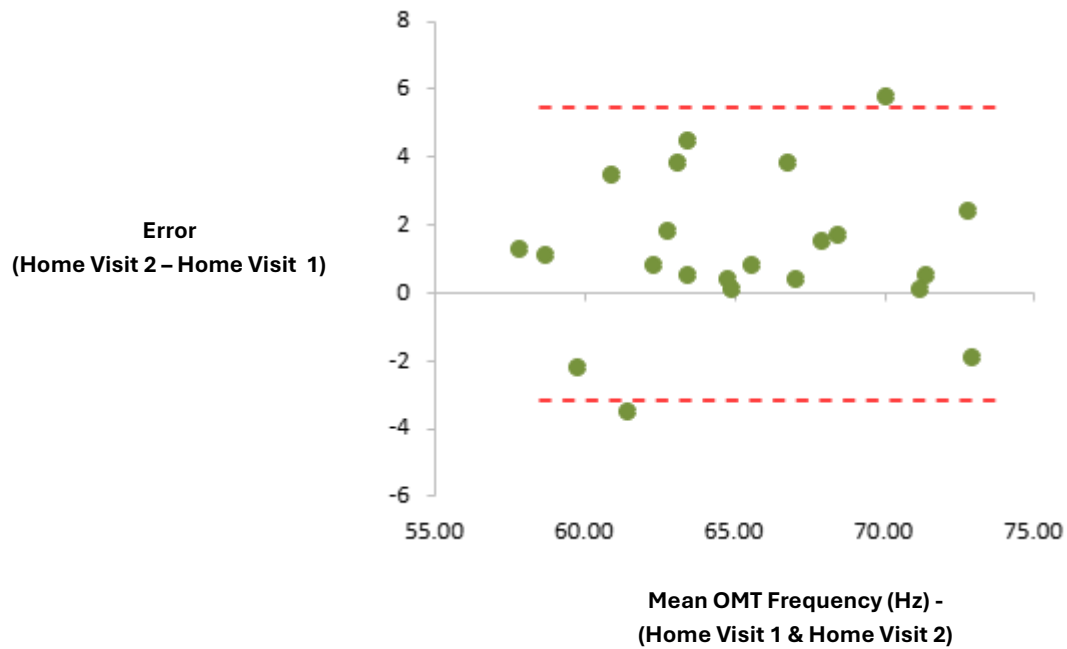

Supplement: Supplementary file 1 [file 0f11f0867264fc181c84f6c3.pdf]
